# The mass balance model of obesity explains the weight loss advantage of a low-carbohydrate diet over a isocaloric low-fat diet

Anssi H. Manninen<sup>1</sup> Francisco Arencibia-Albite<sup>2</sup>

<sup>1</sup>Dominus Nutrition Oy, Finland

<sup>2</sup>Universidad del Sagrado Corazón, Natural Sciences Department, Puerto Rico

Corresponding author: Anssi H. Manninen; [anssi@dominusnutrition.fi](mailto:anssi@dominusnutrition.fi)

## Summary

### Background & Aims

There is an ongoing debate about the role of macronutrient distribution of the diet in weight management and the potential of its modification as an approach to treat obesity. Our aim was to shed light on this highly disputed topic.

### Methods

This computational study utilized the recently proposed mass balance model (MBM) of obesity to simulate the effect of exchanging a high-carbohydrate diet (20% F, 65% C, 15% P; HCD) for an isocaloric very-low-carbohydrate diet (75% F, 10% C, 15% P; VLCD) on body weight in a 70kg person. Furthermore, we investigated whether this model can explain the weight loss associated with the onset of type 1 diabetes.

### Results

Prior any feeding perturbation body weight was stable at ~70kg with a baseline diet of 2 000 kcal (day 0-149). Next this reference diet was exchange by a 2 000 kcal HCD (day 150-400), yet body weight gradually increases to ~73kg. Moreover, after beginning a second isocaloric VLCD (day 400), body weight decreases towards a steady value of ~67.5kg. In addition, it was demonstrated that the MBM can make predictions of body weight loss consistent with the type 1 diabetes treatment during the pre-insulin era.

### Conclusions

The MBM of obesity explains the weight loss advantage of a low-carbohydrate diet over an isocaloric low-fat diet. In addition, this model explains the weight loss associated with the onset of type I diabetes.

Keywords: obesity, energy balance theory, mass balance model, macronutrients

## List of abbreviations

MBM = mass balance model; EBT = energy balance theory; EPM = energy-providing mass; VLCD = very-low-carbohydrate diet; HCD = high-carbohydrate diet; BW = body weight; EI = energy intake; T1D = type 1 diabetes; ECF = extra cellular fluid.

## Introduction

Macronutrients – proteins, fats and carbohydrates – are an important part of a diet, and as such, have been the subject of a great deal of discussion and controversy, especially among obesity researchers. According to the energy balance theory (EBT), “[a] fundamental principle of nutrition and metabolism is that body weight change is associated with an imbalance between the energy content of food eaten and energy expended by the body to maintain life and to perform physical work.” [1] Many current approaches to obesity treatment are based on the EBT; however, neither behavioral prevention nor behavioral treatment is generally successful in practice. Furthermore, this theory has major limitations for explaining obesity, as reviewed by Wells and Siervo [2]. For example, weight stable obese individuals may experience substantial changes in body weight as a reaction to isocaloric modifications in diet. In many instances this body weight alterations are far greater than those expected from the micronutrient-induced changes in total body water. Thus, the EBT collapses in this types of settings.

Arencibia-Albite recently proposed that his mass balance model (MBM) of obesity explains the weight loss advantage of low-carbohydrate diets over isocaloric low-fat diets [3]. Contrary to the EBT, *MBM maintains that body weight fluctuations are dependent on the difference between daily nutrient mass intake and daily mass excretion* (e.g., elimination of macronutrient oxidation products) and NOT on energy imbalance. When the energy fraction from dietary fat increases, while energy intake is clamped, mass intake decreases due to the significantly higher energy density of fat in contrast to other substrates (i.e., carbohydrates and protein). Such a drop in nutrient mass intake, as claimed by the MBM, is what explains the often superior weight loss observed in trials of low-carbohydrate diets versus isocaloric low-fat diets [3].

## Materials and Methods

This theoretical study utilized the MBM by Arencibia-Albite [3]. The algorithm for the simulations is similar to that in the original publication [3]. Feeding perturbations are induced by changing the macronutrients distribution. This adjusts the energy-providing mass (EMP) parameter according to:

$$EPM = EI \left( x_C / \rho_C + x_F / \rho_F + x_P / \rho_P \right)$$

where EI is the energy intake;  $0 \leq x_i \leq 1$  is the energy fraction from  $i = C$  (carbohydrate),  $F$  (fat),  $P$  (protein); and  $\rho_i$  is the energy density of  $i$  with  $\rho_C = 4.2 \text{ kcal} / \text{g}$ ,  $\rho_F = 9.4 \text{ kcal} / \text{g}$ ,  $\rho_P = 4.7 \text{ kcal} / \text{g}$ . The non-energy providing mass was kept constant through simulations (e.g., Na and water intake remain unaltered).

## Results

The **Figure 1 A** simulates the effect of exchanging a high-carbohydrate diet (HCD) for an isocaloric very-low-carbohydrate diet (VLCD) in a weight-stable 70kg individual. Under the HCD (day 150-400), body weight gradually increases to ~73kg. However, after beginning the isocaloric VLCD (day 400), body weight decreases towards a steady value of ~67.5kg. For further details, see the figure legend.

Another interesting aspect of the MBM is its capacity to account for the degree of weight loss observed at the onset of type 1 diabetes (T1D). Before the discovery of insulin, a common dietary treatment of T1D was a very-low-carbohydrate diet/high-fat diet which slowed down or stopped the excessive weight loss while alleviating the classical symptoms of polyuria, polyphagia and polydipsia [10]. The **Figure 1 B** shows that the MBM explains the weight loss associated to the onset of T1D and also makes predictions consistent with the diabetes treatment during the pre-insulin era. For further details, see the figure legend.

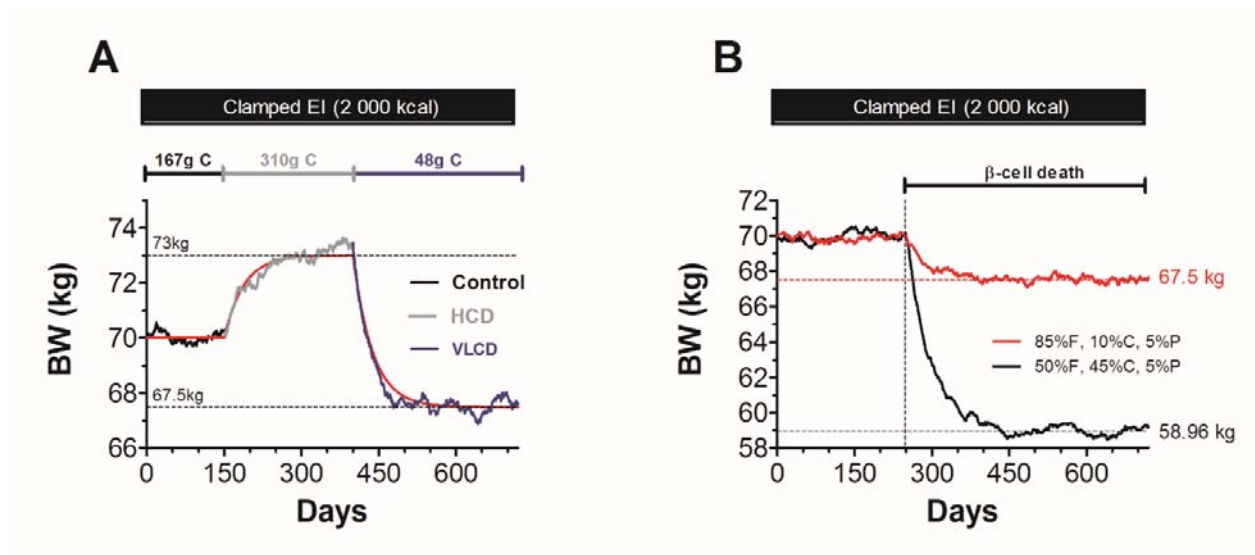

**[FIGURE LEGEND STARTS] FIGURE 1 A.** The figure simulates the effect of exchanging a high-carbohydrate diet (HCD) for an isocaloric very-low-carbohydrate diet (VLCD). Body weight (BW) is stable at ~70 kg with an average energy intake (EI) of 2 000 kcal during 150 days (Control: 50% fat (F), 35% carbohydrate (C), 15% protein (P)). The mean daily C consumption is 167g. At day 150 the average energy intake remains clamped at 2 000 kcal but the average ingested C mass has increased by 143g as the control diet is exchange for a HCD (20% F, 65% C, 15% P). On day 400, energy intake continuous to be 2 000 kcal but the diet is exchange again for a VLCD (75% F, 10% C, 15% P). Here the average C intake decreases by 262g. The noisy trace is a Monte Carlo simulation of the MBM whereas the smooth red curve is its deterministic version. **Figure 1 B.** The MBM predicts that the weight loss magnitude evoked by pancreatic  $\beta$ -cell death is dependent on the diet's macronutrient composition. To recreate the  $\beta$ -cell death effects the absorbed macronutrient distribution is adjusted according to the diet composition but with  $x_C$  set to zero as the bulk of ingested glucose is lost through urination. **[FIGURE LEGEND ENDS]**

## Discussion

According to the EBT, at energy balance, changes in macronutrient composition elicit non-substantial changes in body weight ( $\Delta BW$ ). These alterations are assumed to be secondary to changes in the

extracellular fluid ( $\Delta ECF$ ) that follow from adjustments in the diet's Na ( $\Delta Na$ ) content and carbohydrate intake ( $CI$ ). Hall's energy balance model [4] postulates that in these circumstances, once weight stability is achieved (i.e.,  $dBW/dt = 0$  and  $dECF/dt = 0$ ), the magnitude in  $\Delta BW$  is well approximated by

$$\begin{aligned}\Delta BW &= \Delta ECF \\ &= \left( \Delta Na + \xi_{CI} \left[ CI_{final} / CI_{initial} - 1 \right] \right) / \xi_{Na} \\ &= \left( \Delta Na + 4 \left[ CI_{final} / CI_{initial} - 1 \right] \right) / 3\end{aligned}$$

where the density of the ECF is approximately 1kg/L. If this expression is applied to **Figure 1 A** with  $\Delta Na = 0$  then from day 150 to 400 we get

$$\Delta BW = (0 + 4[310/167 - 1]) / 3 \approx 1.14 \text{ kg}$$

Likewise, after day 400

$$\Delta BW = (0 + 4[48/310 - 1]) / 3 \approx -1.13 \text{ kg}$$

Consequently, from the EBT perspective, the simulation in the **Figure 1 A** is unrealistic as BW alterations are much greater than expected when energy balance is assumed to be present. From the MBM standpoint, however, nutrient mass intake among diets is clearly distinct. In the baseline diet, for instance, EPM is near 337g whereas in the VLCD EPM increases to about 416g ( $\Delta EPM = 79g$ ). Since mass is conserved, this extra 79g of nutrient mass will accumulate over time until mass balance is achieved like in the **Figure 1 A**. As explained by Arencibia-Albite [3], it is possible for an open system, such as the human body, to be at mass balance while the system experiences a persistent energy imbalance. Thus, the MBM does not violate the First Law of Thermodynamics. The EBT, in contrast, ignores the Law of Conservation of Mass [3]. This Law dates from Antoine Lavoisier's 1789 discovery that mass is neither created nor destroyed in any chemical reaction; hence, the mass of oxidized macronutrients will equal the mass of the excreted oxidation products. Daily weight loss is, therefore, the result of daily the elimination of oxidation products (e.g.,  $CO_2$ ,  $H_2O$ , urea, etc.) and not a consequence of the heat release upon nutrient combustion (i.e., daily energy expenditure)[3].

Numerous well-controlled studies [e.g., 5, 6, 7, 8, 9] have reported similar findings as presented in the **Figure 1 A**. In addition, the **Figure 1 B** is consistent with a review of case histories from the pre-insulin era demonstrating that a 70% fat, 8% carbohydrate diet could eliminate glycosuria among hospitalized diabetic patients [10]. These theoretical findings indirectly stress the fact that that energy intake (i.e., Calories) represents the heat release upon food oxidation, and as such, Calories have nothing to do with the body mass. *Heat does not produce body mass*. Calories are simply a measurement of the heat released after substrate oxidation – nothing more and nothing less. Therefore, it is our view that the MBM should be taken seriously.

## Conclusions

It is demonstrated here that the MBM of obesity explains the weight loss advantage of a low-carbohydrate diet over an isocaloric low-fat diet. In addition, this model explains the weight loss associated with the onset of T1D and also makes predictions consistent with the diabetes treatment during the pre-insulin era.

In summary, we provide compelling evidence that the MBM may serve as a valuable tool for understanding the role of macronutrients in diseases like obesity, diabetes and metabolic syndrome. We are certainly not

claiming that our model is definitive, but rather to stimulate researchers around the world to acknowledge that the widely accepted EBT is incorrect. As was shown, the EBT, by ignoring the Law of Conservation of Mass, collapses in settings where substantial changes in body weight occurs under a fixed level of EI.

## Authors contribution

Study concept and designing: Manninen, Arencibia-Albite

Acquisition of data: Manninen, Arencibia-Albite

Statistical analysis and interpretation of data: Manninen, Arencibia-Albite

Drafting the manuscript: Manninen, Arencibia-Albite

Critical revision of the manuscript for important intellectual content: Manninen, Arencibia-Albite

Administrative, technical or material support: Manninen, Arencibia-Albite.

Study supervision: N/A.

## Funding sources

This research did not receive any specific grant from funding agencies in the public, commercial, or not-for-profit sectors.

## Declaration of competing interests

The authors declare that they have no competing interests.

## References

1. Hall K.D. Heymsfield S.B. Kemnitz J.W. Klein S. Schoeller D.A. Speakman J.R.

**Energy balance and its components: implications for body weight regulation**

*Am J Clin Nutr.* 2012; **95**: 989-994.

2. Wells J.C.K. Siervo M.

**Obesity and energy balance: is the tail wagging the dog?**

*Eur J Clin Nutr.* 2011; **65**: 1173–1189.

3. Arencibia-Albite F.

**Serious analytical inconsistencies challenge the validity of the energy balance theory.**

*Heliyon.* 2020 Jul 10;6(7):e04204. doi: 10.1016/j.heliyon.2020.e04204.

4. Hall KD, Bemis T, Brychta TR, Chen KY, Courville A, Crayner EJ, et al.

# **Calorie for Calorie, Dietary Fat Restriction Results in More Body Fat Loss than Carbohydrate Restriction in People with Obesity.**

*Cell Metabolism*. 2015; **22**: 531.

5. Lean M, Han T, Prvan T, Richmond P, Avenell A.

## **Weight loss with high and low carbohydrate 1200 kcal diets in free living women**

*European Journal of Clinical Nutrition*. 1997; **51**: 243–248.

6. Bazzano LA, Tian H, Reynolds K, Yao L, Bunol C, Liu Y, et al.

## **Effects of Low-Carbohydrate and Low-Fat Diets**

*Annals of Internal Medicine*. 2014; **161**: 309.

7. Samaha FF, Iqbal N, Seshadri P, Chicano KL, Daily DA, McGrory J, et al.

## **A Low-Carbohydrate as Compared with a Low-Fat Diet in Severe Obesity**

*New England Journal of Medicine*. 2003; **348**: 2074–2081.

8. Brehm BJ, Seeley RJ, Daniels SR, D'Alessio DA.

## **A Randomized Trial Comparing a Very Low Carbohydrate Diet and a Calorie-Restricted Low Fat Diet on Body Weight and Cardiovascular Risk Factors in Healthy Women.**

*The Journal of Clinical Endocrinology & Metabolism*. 2003; **88**: 1617–1623.

9. Brehm BJ, Spang SE, Lattin BL, Seeley RJ, Daniels RS, D'Alessio DA.

## **The Role of Energy Expenditure in the Differential Weight Loss in Obese Women on Low-Fat and Low-Carbohydrate Diets**

*The Journal of Clinical Endocrinology & Metabolism*. 2005; **90**: 1475–1482.

10. Westman E.C. Yancy W.S. Humphreys M.

## **Dietary treatment of diabetes mellitus in the pre-insulin era (1914-1922)**

*Perspect Biol Med*. 2006; **49**: 77-83.
